# Supplementary material
Source: PubMed Central journal article supplement (PMC2867866)
Supplement: 0915133107_pnas.200915133SI.pdf [file 0915133107_pnas.200915133SI.pdf]

# Supporting Information

Willcocks et al. 10.1073/pnas.0915133107

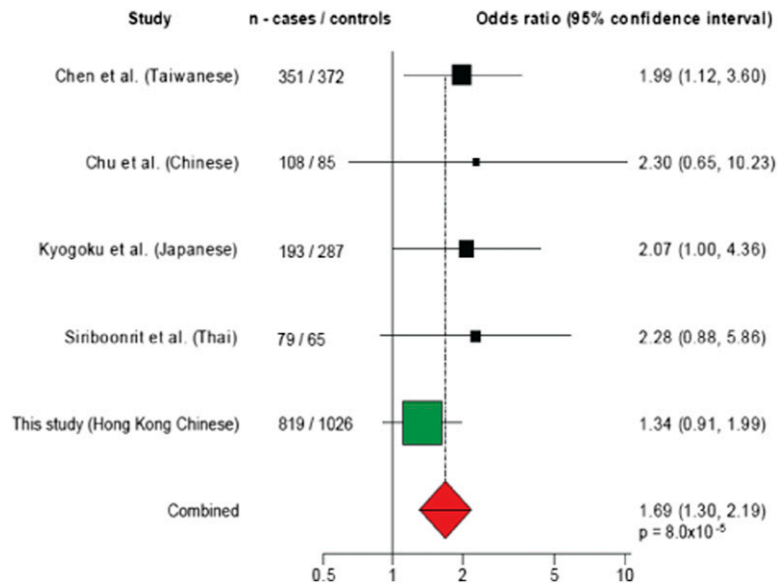

Fig. S1. Meta-analysis of association between Fc $\gamma$ RIIb<sup>T232</sup> homozygosity and systemic lupus erythematosus (SLE) in Asians. Meta-analysis performed using StatsDirect software (random effects model by DerSimonian and Laird shown in ref. 1).

1. DerSimonian R, Laird N (1986) Meta-analysis in clinical trials. *Control Clin Trials* 7:177–188.

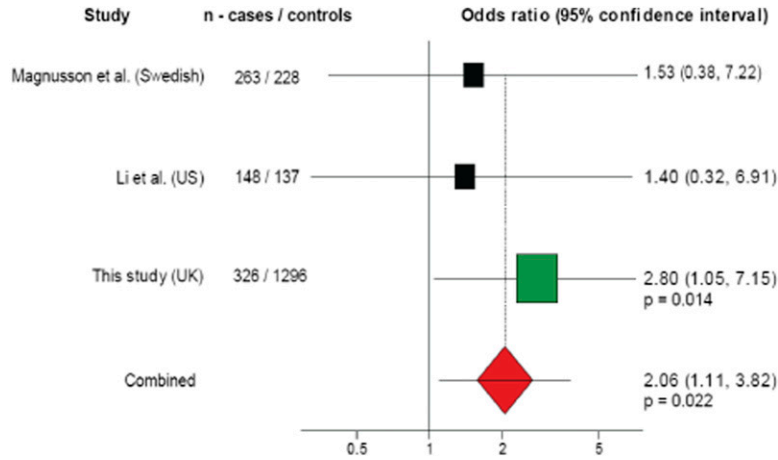

Fig. S2. Meta-analysis of association between Fc $\gamma$ RIIb<sup>T232</sup> homozygosity and SLE in Caucasians. Meta-analysis performed using StatsDirect software (random effects model by DerSimonian and Laird shown in ref. 1).

1. DerSimonian R, Laird N (1986) Meta-analysis in clinical trials. *Control Clin Trials* 7:177–188.

**Table S1. Genotype and allele frequencies for FcγRIIb<sup>T232</sup> in controls and SLE cohorts of Asian adults**

| Genotype  | Taiwanese (1) |      |       |      |                   | Thai (2) |      |       |      |                   | Japanese (3) |      |       |      |                   | Chinese (4) |      |       |      |                   | Hong Kong Chinese |      |                    |      |                   |
|-----------|---------------|------|-------|------|-------------------|----------|------|-------|------|-------------------|--------------|------|-------|------|-------------------|-------------|------|-------|------|-------------------|-------------------|------|--------------------|------|-------------------|
|           | Controls      |      | Cases |      | P                 | Controls |      | Cases |      | P                 | Controls     |      | Cases |      | P                 | Controls    |      | Cases |      | P                 | Controls*         |      | Cases <sup>†</sup> |      | P                 |
|           | n             | Freq | n     | Freq |                   | n        | Freq | n     | Freq |                   | n            | Freq | n     | Freq |                   | n           | Freq | n     | Freq |                   | n                 | Freq | n                  | Freq |                   |
| II        | 206           | 0.55 | 189   | 0.54 |                   | 97       | 0.59 | 38    | 0.48 |                   | 183          | 0.61 | 106   | 0.55 |                   | 51          | 0.6  | 49    | 0.45 |                   | 565               | 0.55 | 475                | 0.58 |                   |
| TT        | 22            | 0.06 | 39    | 0.11 | 0.04 <sup>‡</sup> | 12       | 0.07 | 12    | 0.15 | 0.1 <sup>‡</sup>  | 16           | 0.05 | 21    | 0.11 | 0.06 <sup>‡</sup> | 4           | 0.05 | 11    | 0.10 | 0.09 <sup>‡</sup> | 57                | 0.06 | 60                 | 0.07 | 0.06 <sup>‡</sup> |
| IT        | 144           | 0.39 | 123   | 0.35 |                   | 56       | 0.34 | 29    | 0.37 |                   | 104          | 0.34 | 66    | 0.34 |                   | 30          | 0.35 | 48    | 0.44 |                   | 404               | 0.39 | 284                | 0.35 |                   |
| TT        | 22            | 0.06 | 39    | 0.11 | 0.02 <sup>§</sup> | 12       | 0.07 | 12    | 0.15 | 0.07 <sup>§</sup> | 16           | 0.05 | 21    | 0.11 | 0.02 <sup>§</sup> | 4           | 0.05 | 11    | 0.10 | 0.19 <sup>§</sup> | 57                | 0.06 | 60                 | 0.07 | 0.12 <sup>§</sup> |
| II and IT | 350           | 0.94 | 312   | 0.89 |                   | 153      | 0.93 | 67    | 0.85 |                   | 287          | 0.95 | 172   | 0.89 |                   | 81          | 0.95 | 97    | 0.90 |                   | 969               | 0.94 | 759                | 0.93 |                   |

Freq, frequency.

\*Controls are in Hardy-Weinberg equilibrium (HWE;  $P = 0.38$ ).

<sup>†</sup>Cases are in HWE ( $P = 0.16$ ).

<sup>‡</sup> $P$  value calculated by  $\chi^2$  test using a  $2 \times 3$  contingency table ( $df = 2$ ).

<sup>§</sup> $P$  value and odds ratio (OR) calculated by  $\chi^2$  test using a  $2 \times 2$  contingency table ( $df = 1$ ).

- Chen JY, et al. (2006) Association of a transmembrane polymorphism of Fcγ receptor IIb (FCGR2B) with systemic lupus erythematosus in Taiwanese patients. *Arthritis Rheum* 54: 3908–3917.
- Siriboonrit U, et al. (2003) Association of Fcγ receptor IIb and IIIb polymorphisms with susceptibility to systemic lupus erythematosus in Thais. *Tissue Antigens* 61:374–383.
- Kyogoku C, et al. (2002) Fcγ receptor gene polymorphisms in Japanese patients with systemic lupus erythematosus: Contribution of FCGR2B to genetic susceptibility. *Arthritis Rheum* 46:1242–1254.
- Chu ZT, et al. (2004) Association of Fcγ receptor IIb polymorphism with susceptibility to systemic lupus erythematosus in Chinese: A common susceptibility gene in the Asian populations. *Tissue Antigens* 63:21–27.

**Table S2. Genotype and allele frequencies for FcγRIIb<sup>T232</sup> in controls and SLE cohorts of Caucasian adults**

| Genotype  | Sweden (1) |      |       |      |                   | United States (2) |      |       |      |                   | United Kingdom |      |                    |      |                    |
|-----------|------------|------|-------|------|-------------------|-------------------|------|-------|------|-------------------|----------------|------|--------------------|------|--------------------|
|           | Controls   |      | Cases |      | P                 | Controls          |      | Cases |      | P                 | Controls*      |      | Cases <sup>†</sup> |      | P                  |
|           | n          | Freq | n     | Freq |                   | n                 | Freq | n     | Freq |                   | n              | Freq | n                  | Freq |                    |
| II        | 171        | 0.75 | 189   | 0.72 |                   | 106               | 0.77 | 112   | 0.76 |                   | 1,051          | 0.81 | 269                | 0.83 |                    |
| TT        | 4          | 0.02 | 7     | 0.03 | 0.65 <sup>‡</sup> | 4                 | 0.03 | 6     | 0.04 | 0.86 <sup>‡</sup> | 13             | 0.01 | 9                  | 0.03 | 0.02 <sup>‡</sup>  |
| IT        | 53         | 0.23 | 67    | 0.25 |                   | 27                | 0.2  | 30    | 0.2  |                   | 232            | 0.18 | 48                 | 0.15 |                    |
| TT        | 4          | 0.02 | 7     | 0.03 | 0.55 <sup>§</sup> | 4                 | 0.03 | 6     | 0.04 | 0.75 <sup>§</sup> | 13             | 0.01 | 9                  | 0.03 | 0.014 <sup>§</sup> |
| II and IT | 224        | 0.98 | 256   | 0.97 |                   | 133               | 0.97 | 142   | 0.96 |                   | 1,283          | 0.99 | 317                | 0.97 |                    |

Freq, frequency.

\*Controls are in HWE ( $P = 1.0$ ).

<sup>†</sup>Cases are not in HWE ( $P = 0.003$ ).

<sup>‡</sup> $P$  value calculated by  $\chi^2$  test using a  $2 \times 3$  contingency table ( $df = 2$ ).

<sup>§</sup> $P$  value and odds ratio (OR) calculated by  $\chi^2$  test using a  $2 \times 2$  contingency table ( $df = 1$ ).

- Magnusson V, et al. (2004) Polymorphisms of the Fcγ receptor type IIb gene are not associated with systemic lupus erythematosus in the Swedish population. *Arthritis Rheum* 50: 1348–1350.
- Li X, et al. (2003) A novel polymorphism in the Fcγ receptor IIb (CD32B) transmembrane region alters receptor signaling. *Arthritis Rheum* 48:3242–3252.

**Table S3. FCGR2B genotyping results for the mild malaria cohort: Incidence rates and unadjusted incidence rate ratios (IRR) for malaria**

|    | n   | Person weeks of observation | Malaria | Incidence | IRR  | 95% CI    | P value |
|----|-----|-----------------------------|---------|-----------|------|-----------|---------|
| II | 262 | 35,399                      | 1,257   | 1.85      | 1    |           |         |
| IT | 187 | 23,705                      | 914     | 2.00      | 1.09 | 0.92–1.29 | 0.341   |
| TT | 24  | 3,323                       | 99      | 1.55      | 0.84 | 0.57–1.23 | 0.372   |

All incidence rates are expressed as episodes per child per year. CI, confidence interval.

**Table S4. FCGR2B genotyping results for the mild malaria cohort: IRRs adjusted for sickle cell, thalassaemia, season, ethnic group, and age**

|    | <i>n</i> | Person weeks of observation | Malaria | Incidence | IRR  | 95% CI    | <i>P</i> value |
|----|----------|-----------------------------|---------|-----------|------|-----------|----------------|
| II | 262      | 35,399                      | 1,257   | 1.85      | 1    |           |                |
| IT | 187      | 23,705                      | 914     | 2.00      | 1.05 | 0.87–1.26 | 0.639          |
| TT | 24       | 3,323                       | 99      | 1.55      | 0.92 | 0.61–1.37 | 0.668          |

All incidence rates are expressed as episodes per child per year. CI, confidence interval.

**Table S5. FCGR2B genotyping results for the mild malaria cohort: Parasite densities during malaria infections**

|    | <i>n</i> | Mean log parasitaemia | 95% CI    | <i>P</i> value |
|----|----------|-----------------------|-----------|----------------|
| II | 1,257    | 4.16                  | 4.10–4.21 |                |
| IT | 914      | 4.15                  | 4.09–4.22 | 0.878          |
| TT | 99       | 4.24                  | 4.05–4.43 | 0.438          |

All incidence rates are expressed as episodes per child per year. CI, confidence interval.

**Table S6. FCGR2B genotyping results for the mild malaria cohort: Non-malaria fever detected by active surveillance (fever >37.5 °C in absence of malaria parasites)**

|    | <i>n</i> | Patient weeks of observation | Nonmalaria fever | Incidence | IRR  | 95% CI    | <i>P</i> value |
|----|----------|------------------------------|------------------|-----------|------|-----------|----------------|
| II | 262      | 35,399                       | 710              | 1.04      | 1    |           |                |
| IT | 187      | 23,705                       | 479              | 1.05      | 1.01 | 0.85–1.19 | 1.19           |
| TT | 24       | 3,323                        | 61               | 0.95      | 0.92 | 0.69–1.22 | 1.22           |

All incidence rates are expressed as episodes per child per year. CI, confidence interval.

**Table S7. Distribution of genotype frequencies for FcγRIIb<sup>T232</sup> in controls and bacteremia cohorts of Kenyan children from Kilifi District Hospital**

| Genotype  | Bacterial control group 1** |           | Bacterial case group 1 <sup>†</sup> |           | <i>P</i> value           | Control group 2 <sup>‡</sup> |           | Bacterial case group 2 <sup>§</sup> |           | <i>P</i> value           |
|-----------|-----------------------------|-----------|-------------------------------------|-----------|--------------------------|------------------------------|-----------|-------------------------------------|-----------|--------------------------|
|           | <i>n</i>                    | Frequency | <i>n</i>                            | Frequency |                          | <i>n</i>                     | Frequency | <i>n</i>                            | Frequency |                          |
| II        | 270                         | 0.490     | 436                                 | 0.504     | 0.155 <sup>¶  </sup>     | 875                          | 0.513     | 445                                 | 0.469     | 0.049 <sup>¶  </sup>     |
| TT        | 42                          | 0.076     | 48                                  | 0.045     |                          | 125                          | 0.073     | 64                                  | 0.068     |                          |
| IT        | 239                         | 0.434     | 325                                 | 0.402     |                          | 706                          | 0.414     | 439                                 | 0.463     |                          |
| TT        | 42                          | 0.076     | 48                                  | 0.0593    | 0.219*                   | 125                          | 0.073     | 64                                  | 0.068     | 0.590*                   |
| IT and II | 509                         | 0.924     | 761                                 | 0.940     | OR = 0.76<br>(0.50–1.17) | 1,581                        | 0.927     | 884                                 | 0.932     | OR = 0.92<br>(0.68–1.26) |

\**P* value and OR calculated by  $\chi^2$  test using a 2 × 2 contingency table (df = 1). Numbers in parentheses refer to 95% CIs.

<sup>†</sup>Bacterial case group 1 is in HWE (*P* = 0.47).

<sup>‡</sup>Control group 2 is in HWE (*P* = 0.56).

<sup>§</sup>Bacterial case group 2 is not in HWE (*P* = 0.006).

<sup>¶</sup>*P* value calculated by  $\chi^2$  test using a 2 × 3 contingency table (df = 2).

<sup>||</sup>Genotype was not associated with a specific bacterium, Gram-stain positive or negative, HIV status of the child, or child survival of the infection (multiple logistic regression).

\*\*Bacterial control group 1 is in HWE (*P* = 0.55).

**Table S8. Multiple logistic regression of clinical features in severe malaria case group 1**

| Clinical parameters     | <i>P</i> value |
|-------------------------|----------------|
| Blantyre coma scale     | 0.52           |
| Prostration             | 0.88           |
| Impaired consciousness  | 0.56           |
| Deep breathing          | 0.12           |
| Tachycardia             | 0.067          |
| Mortality               | 0.35           |
| White blood cell count  | 0.31           |
| Red blood cell count    | 0.98           |
| Hemoglobin              | 0.89           |
| Mean corpuscular volume | 0.88           |
| Parasitemia             | 0.72           |
